# Supplementary material
Source: PubMed Central journal article supplement (PMC8995087)
Supplement: develop-149-200131-s1.pdf [file develop-149-200131-s1.pdf]

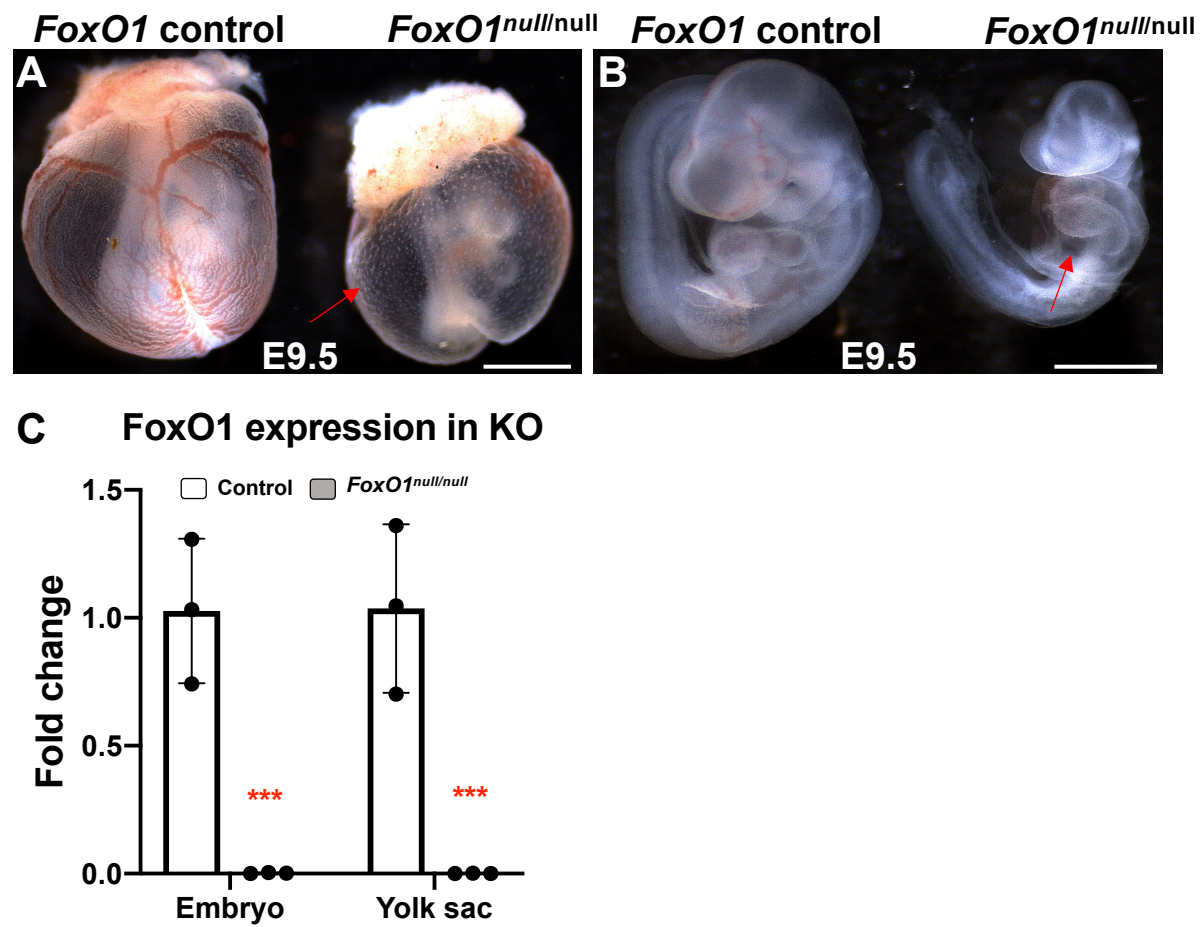

**Fig. S1.** *FoxO1<sup>null</sup>* embryos show vascular remodeling defects. (A and B) Bright field images of E9.5 littermate control and *FoxO1<sup>null</sup>* embryos in and out of the YS. (C) qRT-PCR for FoxO1 expression in control and *FoxO1<sup>null</sup>* YSs.

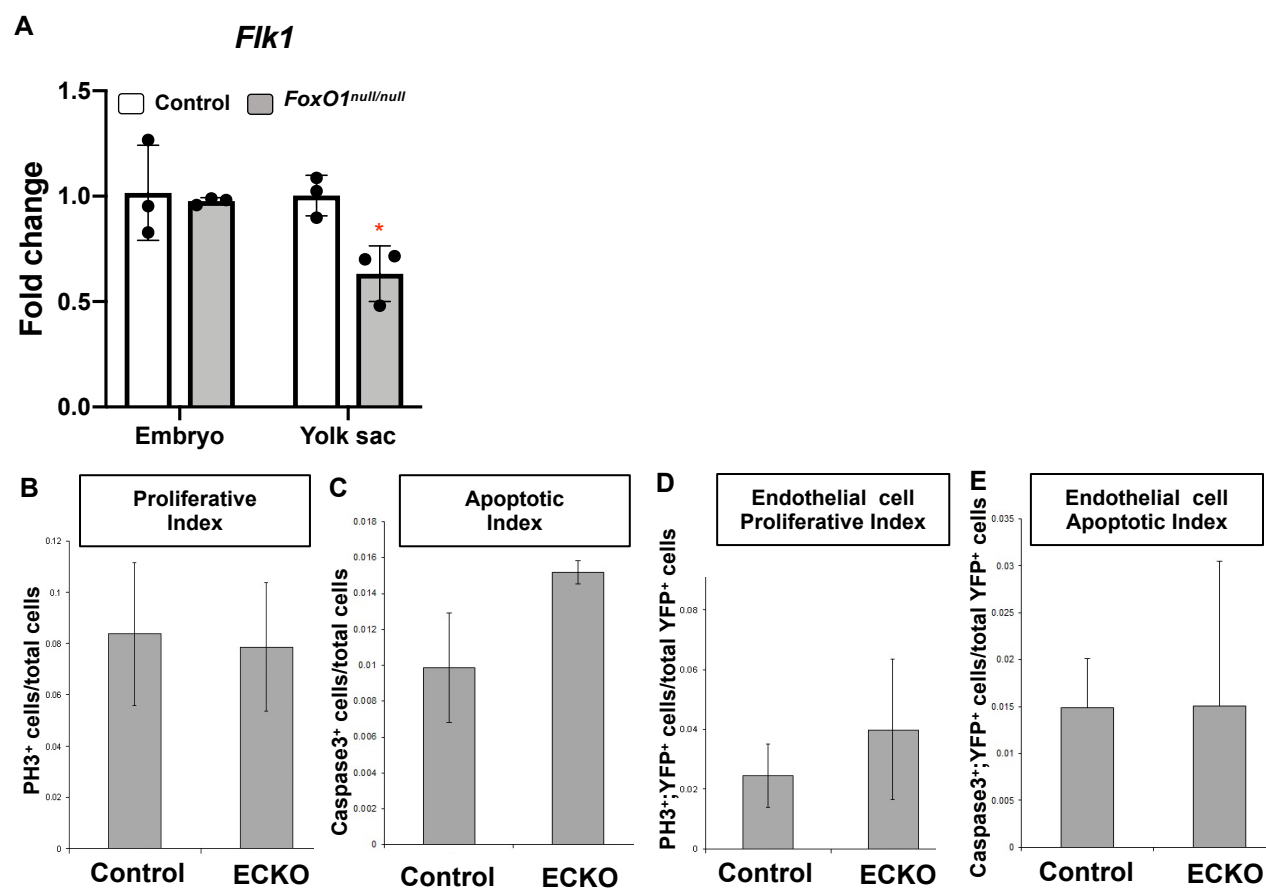

**Fig. S2.** (A) *Flk1* expression in littermate control and *FoxO1<sup>null</sup>* embryos and YSs by qRT-PCR. (B and C) Quantification of proliferation and apoptosis in littermate control and *FoxO1<sup>ECKO</sup>* YSs. (D and E) Quantification of proliferation and apoptosis in littermate control and *FoxO1<sup>ECKO</sup>* YS YFP<sup>+</sup> ECs.

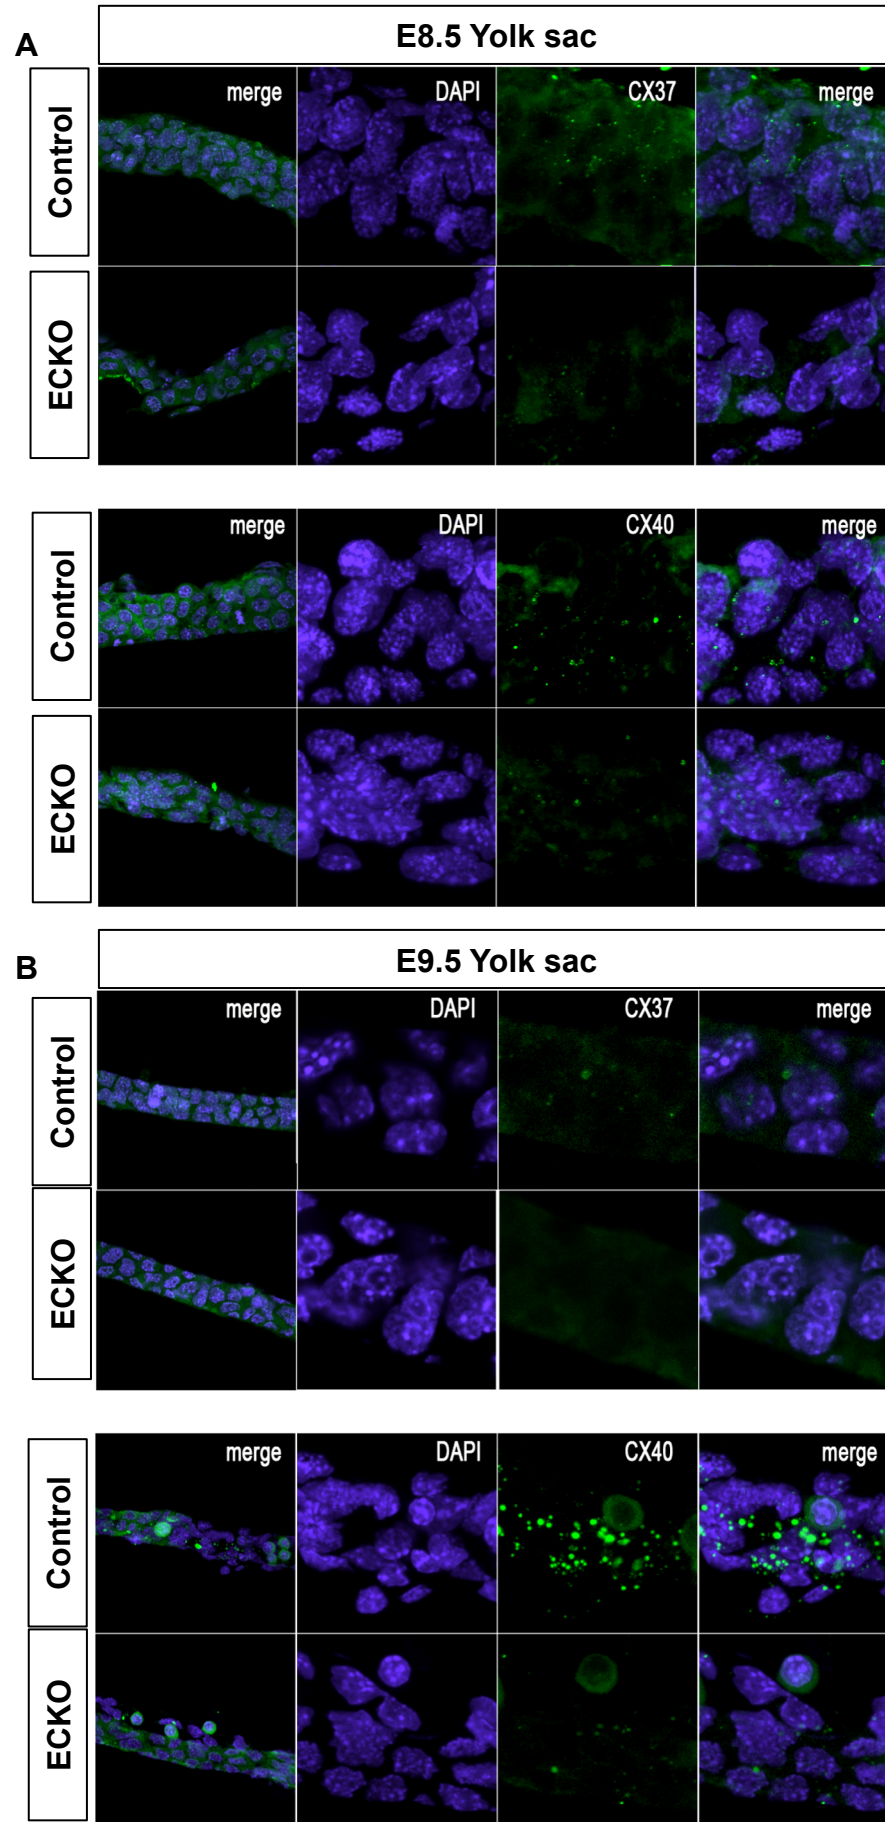

• **Fig. S3.** Co-immuno labeling of CX37, CX40 and DAPI in control and *FoxO1*<sup>ECKO</sup> YSs at E8.25 (A) and E9.5 (B).

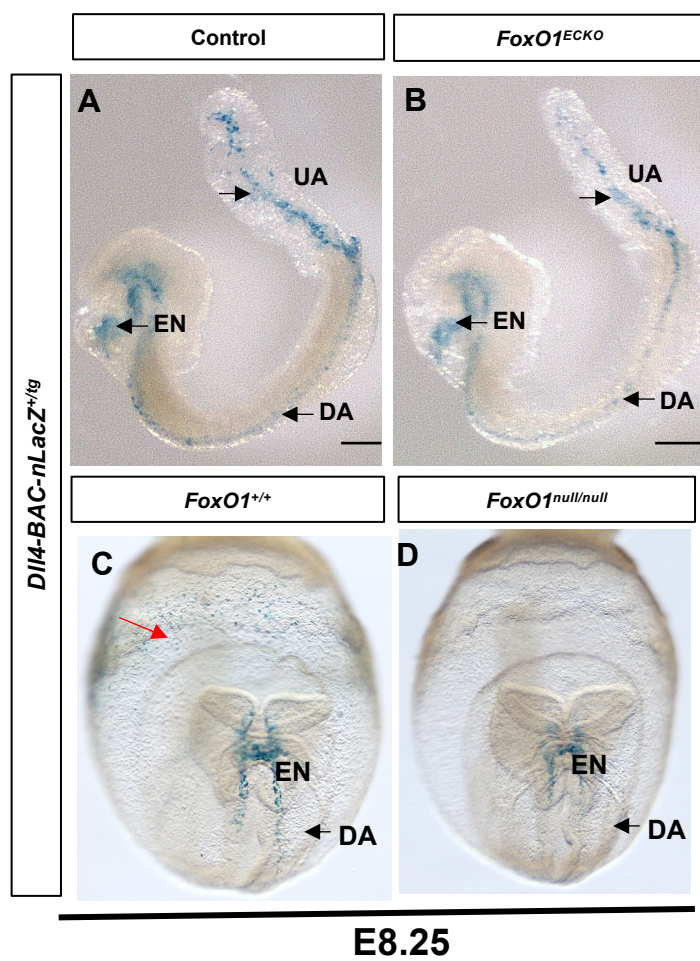

• **Fig. S4.** (A and B) *nlacZ* reporter activity in E8.25 littermate control and *FoxO1<sup>ECKO</sup>* embryos dissected out of the yolk sac. (C and D) Anterior views of *nlacZ* reporter activity in E8.25 littermate control and *FoxO1<sup>null</sup>* embryos. UA = umbilical artery, EN = endocardium, DA = dorsal aorta.



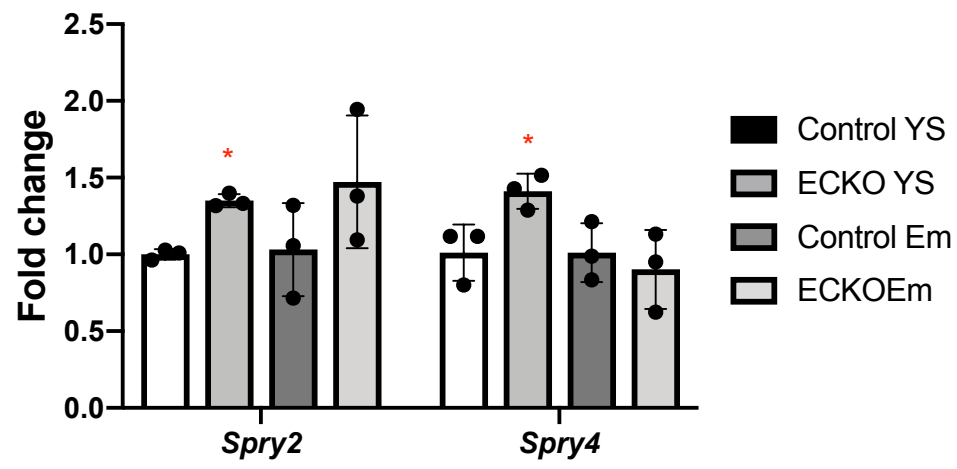

• **Fig. S5.** qRT-PCR for Sprouty2/4 in littermate control and *FoxO1<sup>ECKO</sup>* YSs and embryos. Bars in graph are means $\pm$  standard deviation.

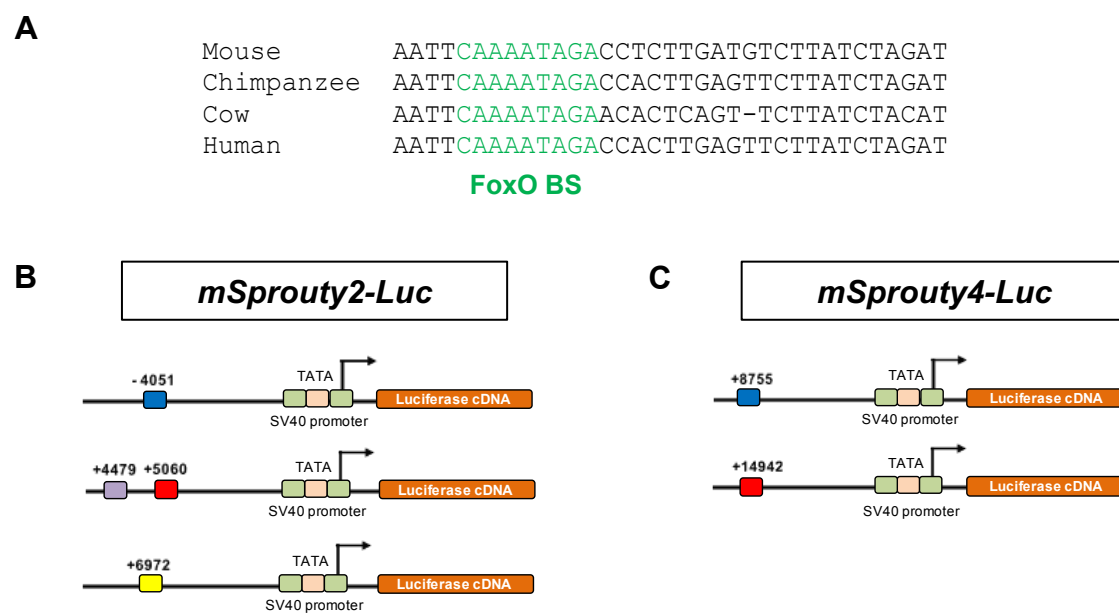

- **Fig. S6.** (A) FOXO1 conserved binding site in Mouse, Chimpanzee, Cow, and Human. (B and C) Luciferase constructs containing FOXO1 binding sites for *Sprouty2* and *Sprouty4*.

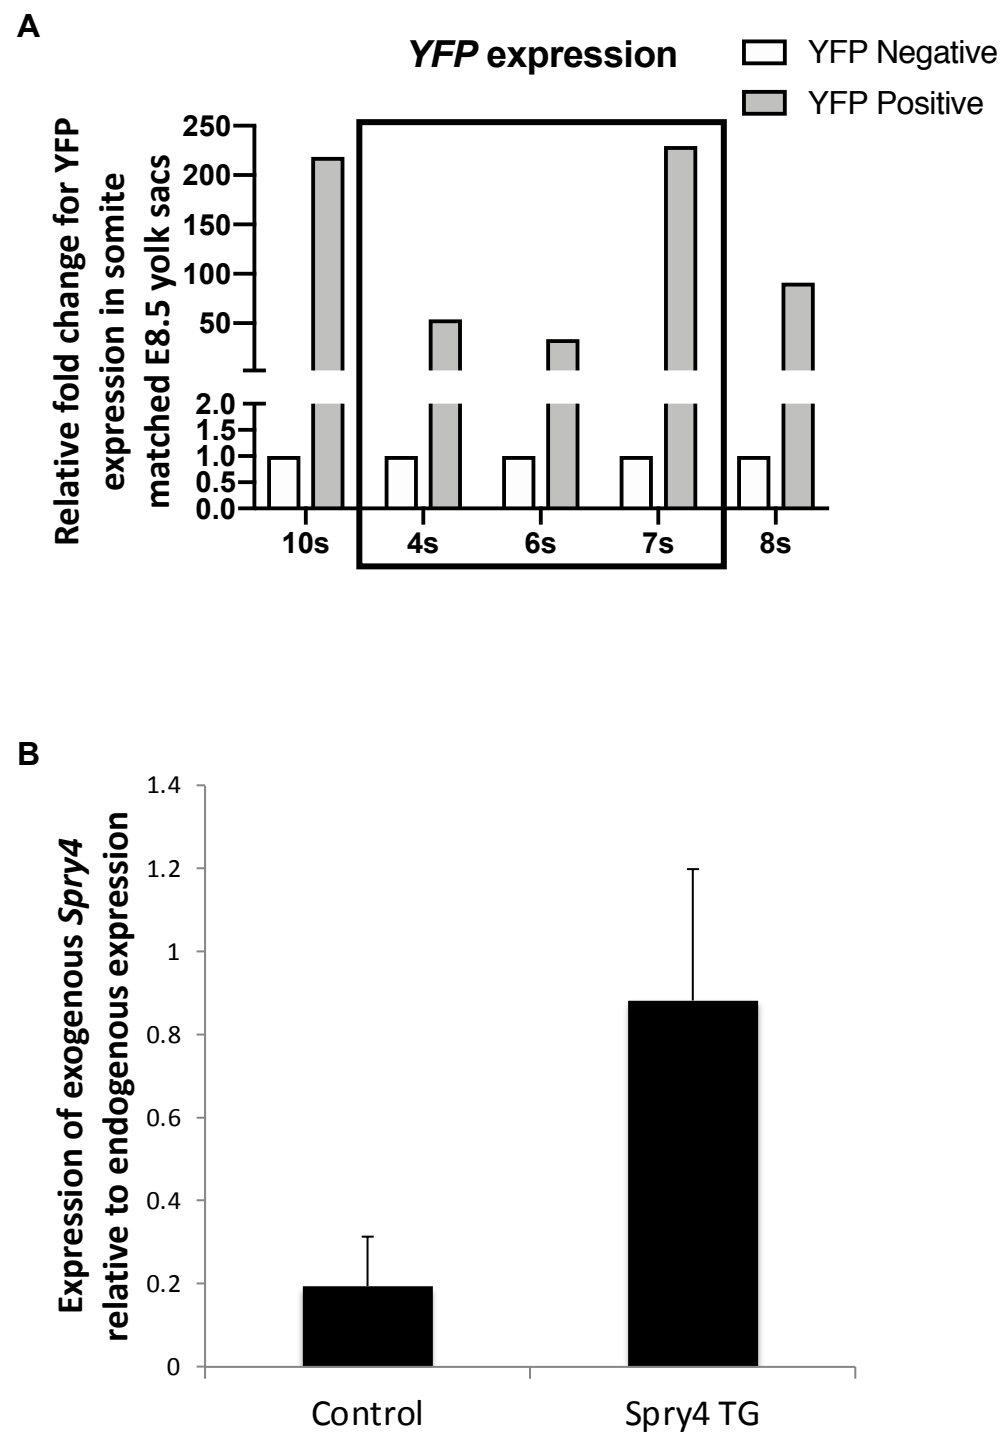

- **Fig. S7.** (A) qRT-PCR for *YFP* expression in somite matched non-transgenic (control) and transgenic embryos. Black box indicates samples that fall within E8.25 somite stage and used for further gene analysis.  
(B) qRT-PCR for relative expression of exogenous *Spry4* to endogenous *Spry4* for all *YFP*+ transgenic embryos and somite matched controls. Bars in graph are means  $\pm$  standard deviation.

**Table S1.** Primer sequences used for genotyping, ChIP-qPCR, and

| <u>cloning Gene/allele</u>       | <u>Primer sequences (5'-3')</u>                                     | <u>Purpose</u> |
|----------------------------------|---------------------------------------------------------------------|----------------|
| ChIP <i>mSprouty2</i> (-4051)    | TTCCAGTCCTCCAAGCAATCTAG<br>AGTGCCTCCAGGAAGGGAAT                     | ChIP-qPCR      |
| ChIP <i>mSprouty2</i> (4479)     | AATTAGCAAATGGCTCCCGG<br>TTTGTGACTGTGCCATGAAGC                       | ChIP-qPCR      |
| ChIP <i>mSprouty2</i> (5060)     | TAGGGCGACTCAGTGGCTATC<br>GACCGGAGTCAAAGGACCTTC                      | ChIP-qPCR      |
| ChIP <i>mSprouty2</i> (6972)     | CATTTGTGTGTTTTGGGGAGAGAT<br>CGGCAGTTGGGTTGGAATTA                    | ChIP-qPCR      |
| ChIP <i>mSprouty4</i> (8755)     | GATCTCCATCCGAATTCCAAATG<br>CTTGGTTTCGGCAAAGGCGAGAAAC                | ChIP-qPCR      |
| ChIP <i>mSprouty4</i> (14942)    | CCACCACAAAAGTTACCACAGAAG<br>GATATCTTCTAGATCAGTAC                    | ChIP-qPCR      |
| ChIP negative control            | GAAACCCGAATCTACATTCCGTTCC<br>CTGGATTAACCCGATTATACACC                | ChIP-qPCR      |
| Luc <i>mSprouty2</i> (-4051)     | GTGTACACAGGTATACTCTAGTCACCAACCC<br>GGGACTCGATGTTGCAATGAGATACTCAACTC | PCR<br>cloning |
| Luc <i>mSprouty2</i> (4479/5060) | GATCTGTGACAAGCAGTGCCTCTGCTCAG<br>GCCACAAGGTGACTAATGTTGTCAAGATGG     | PCR<br>cloning |
| Luc <i>mSprouty2</i> (6972)      | CATTCAGACCTAGCACTGTGATTCATGC<br>CAGTGTTCAAGCAAACCAGGTAGGCCTTGA      | PCR<br>cloning |
| Luc <i>mSprouty4</i> (8755)      | CAGCGGTTCACTTGAAGCTGCCTTGACAAG<br>CTCTGCCTCCCAACTGCTGGGATTAAAG      | PCR<br>cloning |
| Luc <i>mSprouty4</i> (14942)     | CTGTAGCTGTTTCTGACTTCTTGGCTAGC<br>GGCTGAAGACTCATTGTAGAATGGGTCATG     | PCR<br>cloning |
| Endogenous <i>mSpry4 cDNA</i>    | GAAGCCTGTCCCTTGGTGCAGTTCAG<br>CTGGTCAATGGGTAAGATGGTGAGTG            | qRT-PCR        |
| Exogenous <i>mSpry4 cDNA</i>     | GCGAGGTGCAGGAATTCGTTAAGCTCTCCC<br>CTGGTCAATGGGTAAGATGGTGAGTG        | qRT-PCR        |

\* pGL3-Promoter



**Table S2. Taqman assays for Gene expression analysis**

|                    |               |                 |               |
|--------------------|---------------|-----------------|---------------|
| <i>FoxO1</i>       | Mm00490672_m1 | <i>Hey1</i>     | Mm00468865_m1 |
| <i>FoxO3a</i>      | Mm01185722_m1 | <i>Hey2</i>     | Mm00468865_m1 |
| <i>FoxO4</i>       | Mm00840140_g1 | <i>Jagged 1</i> | Mm00496902_m1 |
| <i>Flk1 (Kdr)</i>  | Mm00840140_g1 | <i>Nrp1</i>     | Mm00435379_m1 |
| <i>PECAM1</i>      | Mm01242584_m1 | <i>Nrp2</i>     | Mm00803099_m1 |
| <i>Tie2 (Tek)</i>  | Mm01242584_m1 | <i>CoupTFII</i> | Mm00772789_m1 |
| <i>Flt1</i>        | Mm00438980_m1 | <i>EphB4</i>    | Mm01201157_m1 |
| <i>Connexin 43</i> | Mm00438980_m1 | <i>AFP</i>      | Mm00431715_m1 |
| <i>eNOS</i>        | Mm00435217_m1 | <i>ADM</i>      | Mm00437438_g1 |
| <i>Connexin 37</i> | Mm00433610_s1 | <i>BMPER</i>    | Mm01175806_m1 |
| <i>EphrinB2</i>    | Mm01215897_m1 | <i>Sprouty2</i> | Mm00442344_m1 |
| <i>Notch1</i>      | Mm00435249_m1 | <i>Sprouty4</i> | Mm00442345_m1 |
| <i>DII4</i>        | Mm00444619_m1 |                 |               |
